# Supplementary figures and images for: Human Umbilical Cord MSCs as New Cell Sources for Promoting Periodontal Regeneration in Inflammatory Periodontal Defect
Source: PubMed Central journal article supplement — Theranostics. 2017 Sep 26;7(18):4370–82. doi: 10.7150/thno.19888 (PMC5695137; doi:10.7150/thno.19888), 2017-09-26

# TOC figure

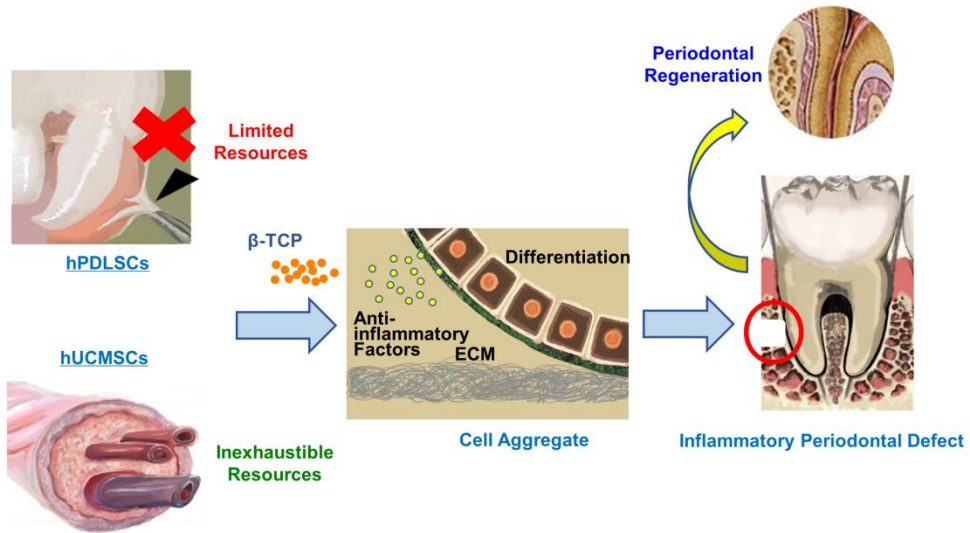

# Supplemental Figure 1

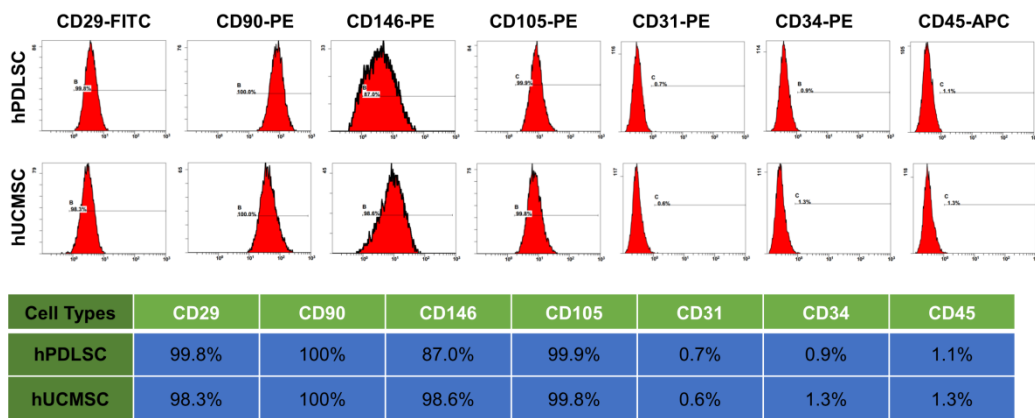

Supplemental Figure 2

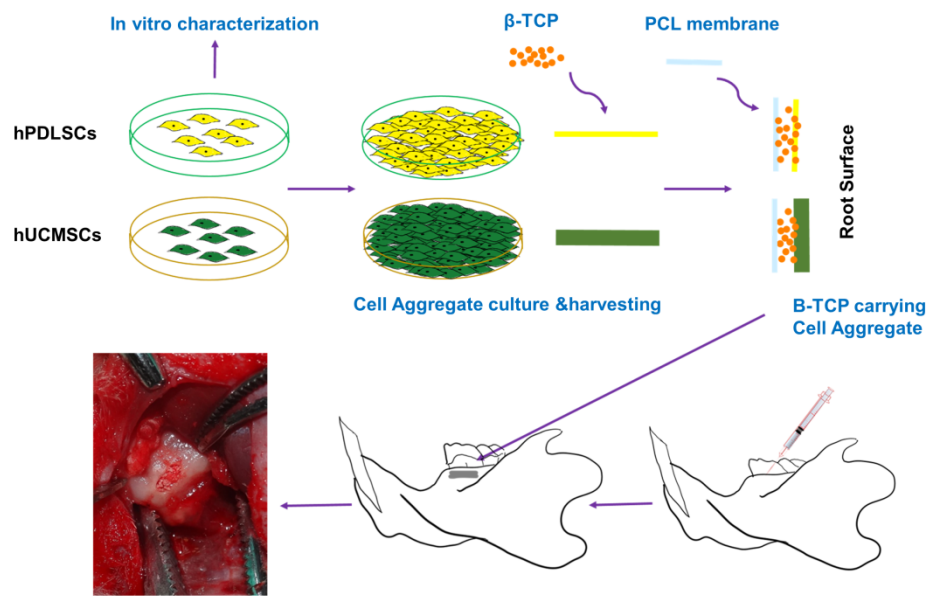

Supplement: thnov07p4370s1.pdf [file thnov07p4370s1.pdf]
